# Supplementary material for: Origin of CO2 as the main carbon source in syngas-to-methanol process over Cu: theoretical evidence from a combined DFT and microkinetic modeling study
Source: Royal Society of Chemistry journal article supplement (doi:10.1039/d0cy00602e), 2020-01-01
Supplement: d0cy00602e1.pdf [file d0cy00602e1.pdf]

## Electronic Supplementary Information

### **Origin of CO<sub>2</sub> as the Main Carbon Source in Syngas-to-Methanol Process over Cu: Theoretical Evidence from a Combined DFT and Microkinetic Modeling Study**

Dongyang Xu<sup>1,2,3</sup>, Panpan Wu<sup>1</sup> and Bo Yang<sup>1,\*</sup>

*<sup>1</sup>School of Physical Science and Technology, ShanghaiTech University, 393 Middle  
Huaxia Road, Shanghai 201210, China*

*<sup>2</sup>CAS Key Laboratory of Low-Carbon Conversion Science & Engineering, Shanghai  
Advanced Research Institute, Chinese Academy of Sciences, Shanghai 201210, China*

*<sup>3</sup>University of Chinese Academy of Sciences, Beijing, 100049, China*

\*Email: [yangbol@shanghaitech.edu.cn](mailto:yangbol@shanghaitech.edu.cn)

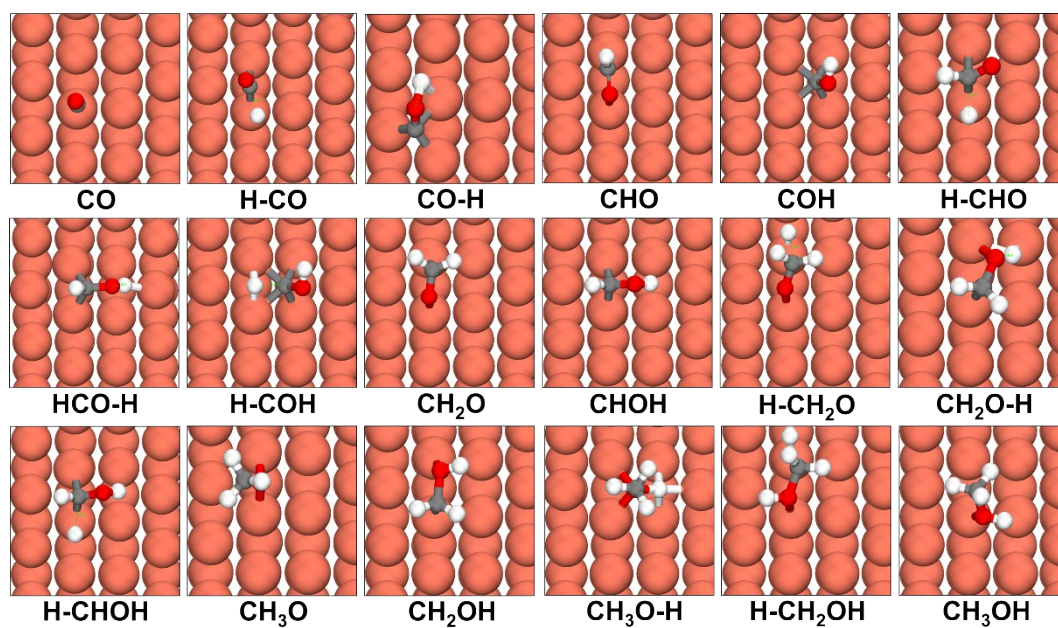

**Figure S1.** Configurations of the adsorption and transition states in the pathway of CO hydrogenation to methanol over clean Cu(211). In this figure and those hereafter, the Cu, C, H, and O atoms are colored orange, gray, white, and red, respectively.

**Table S1.** Activation energies ( $E_a$ ) and reaction energies ( $\Delta E$ ) (both in eV) of the elementary reactions of methanol synthesis from CO<sub>2</sub> hydrogenation over the Cu(211) surface with no HCOO (0HCOO), one HCOO (1HCOO) and two HCOO (2HCOO) pre-covered. The values were obtained from our previous work (Wu and Yang, *ACS Catal.* 2017, 7, 10, 7187-7195).

| Elementary reactions                           | 0HCOO |            | 1HCOO |            | 2HCOO |            |
|------------------------------------------------|-------|------------|-------|------------|-------|------------|
|                                                | $E_a$ | $\Delta E$ | $E_a$ | $\Delta E$ | $E_a$ | $\Delta E$ |
| CO <sub>2</sub> (g)+H*→HCOO*                   | 0.20  | -1.27      | 0.23  | -0.99      | 0.29  | -0.71      |
| HCOO*+H*→HCOOH*+*                              | 1.27  | 0.55       | 1.02  | 0.17       | 0.88  | 0.04       |
| HCOOH*+H*→CH <sub>2</sub> OOH*+*               | 0.76  | -0.11      | 0.79  | 0.03       | 0.82  | 0.05       |
| CH <sub>2</sub> OOH*+*→CH <sub>2</sub> O*+OH*  | 0.42  | 0.35       | 0.49  | 0.34       | 0.30  | 0.31       |
| CH <sub>2</sub> O*+H*→CH <sub>3</sub> O*+*     | 0.11  | -1.09      | 0.21  | -0.91      | 0.61  | -0.53      |
| CH <sub>3</sub> O*+H*→CH <sub>3</sub> OH(g)+2* | 0.89  | 0.37       | 0.72  | 0.29       | 0.59  | 0.02       |
| H*+OH*→H <sub>2</sub> O(g)+2*                  | 1.01  | 0.32       | 0.87  | 0.20       | 0.83  | -0.05      |

**Table S2.** Coverage (in ML) of surface HCOO at steady state obtained from microkinetic modeling at different ratios between gaseous CO and CO<sub>2</sub> at 573 K and 14.24 bar of gaseous reactant. The coverage of pre-covered HCOO on Cu(211) are also listed in the brackets for comparison.

| <b>CO/(CO+CO<sub>2</sub>)</b> | <b>Clean<br/>(0 ML)</b> | <b>1HCOO<br/>(0.083 ML)</b> | <b>2HCOO<br/>(0.167 ML)</b> |
|-------------------------------|-------------------------|-----------------------------|-----------------------------|
| 0.8                           | 0.595                   | 0.088                       | 0.167                       |
| 0.6                           | 0.746                   | 0.092                       | 0.167                       |
| 0.4                           | 0.815                   | 0.097                       | 0.167                       |
| 0.2                           | 0.855                   | 0.102                       | 0.167                       |
| 0                             | 0.880                   | 0.107                       | 0.167                       |
